# Supplementary material for: Integrated Metabolites and Transcriptomics at Different Growth Stages Reveal Polysaccharide and Flavonoid Biosynthesis in Cynomorium songaricum
Source: MDPI journal article supplement (doi:10.3390/ijms231810675), 2022-09-14
Supplement: s1 [file s1]

Supplementary Materials

Figure supplementary legends

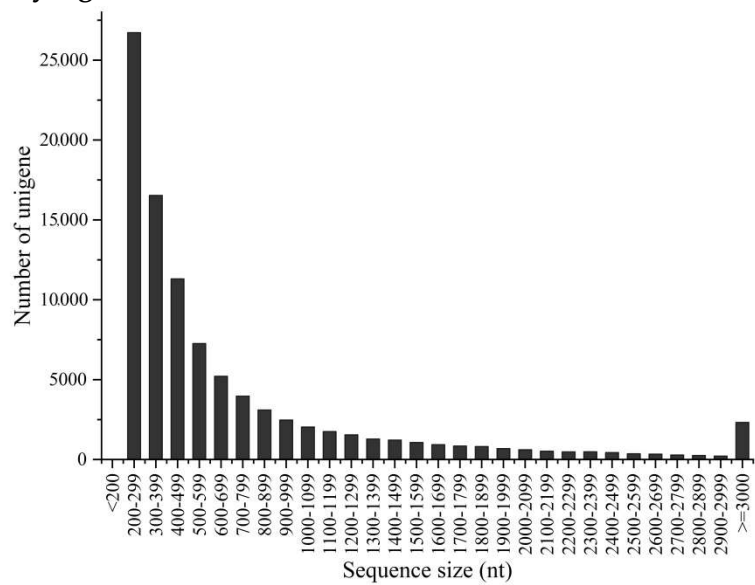

Figure S1. Length distribution of assembled unigenes.

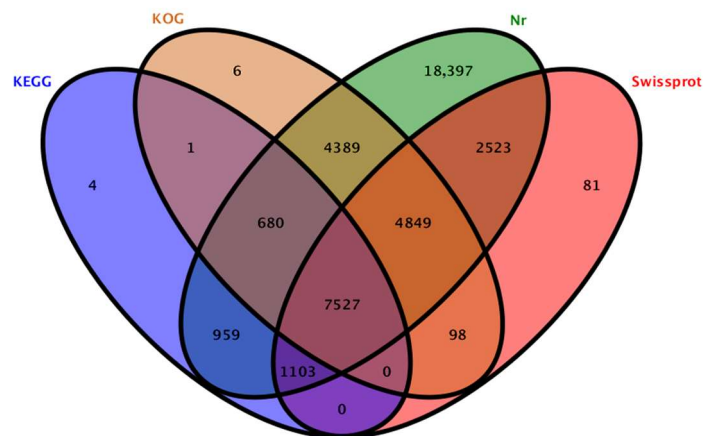

Figure S2. Basic annotation for all unigenes in *C. songaricum* on KEGG, KOG, Nr and Swissprot databases.

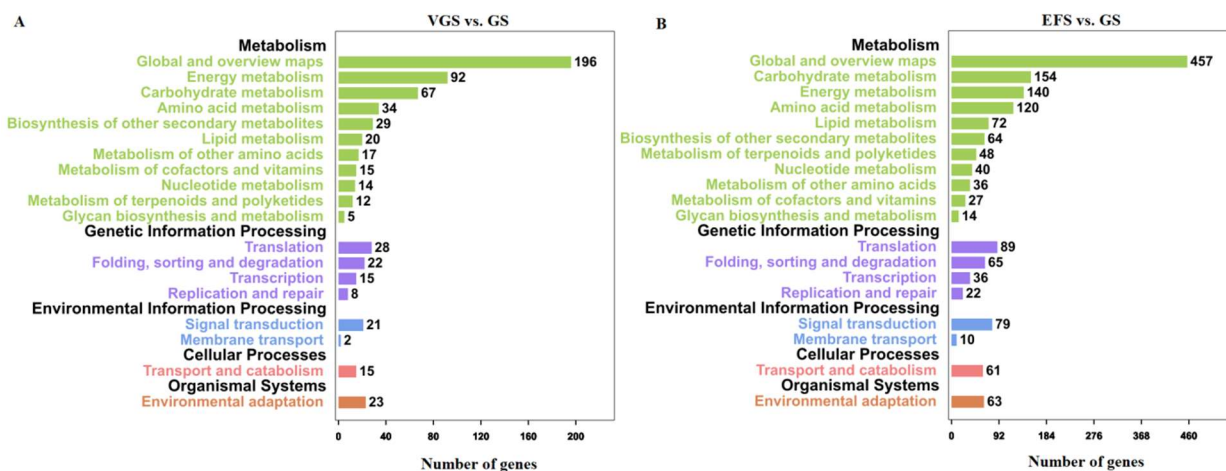

Figure S3. KEGG enrichment of DEGs at VGS vs. GS (A) and EFS vs. GS (B).

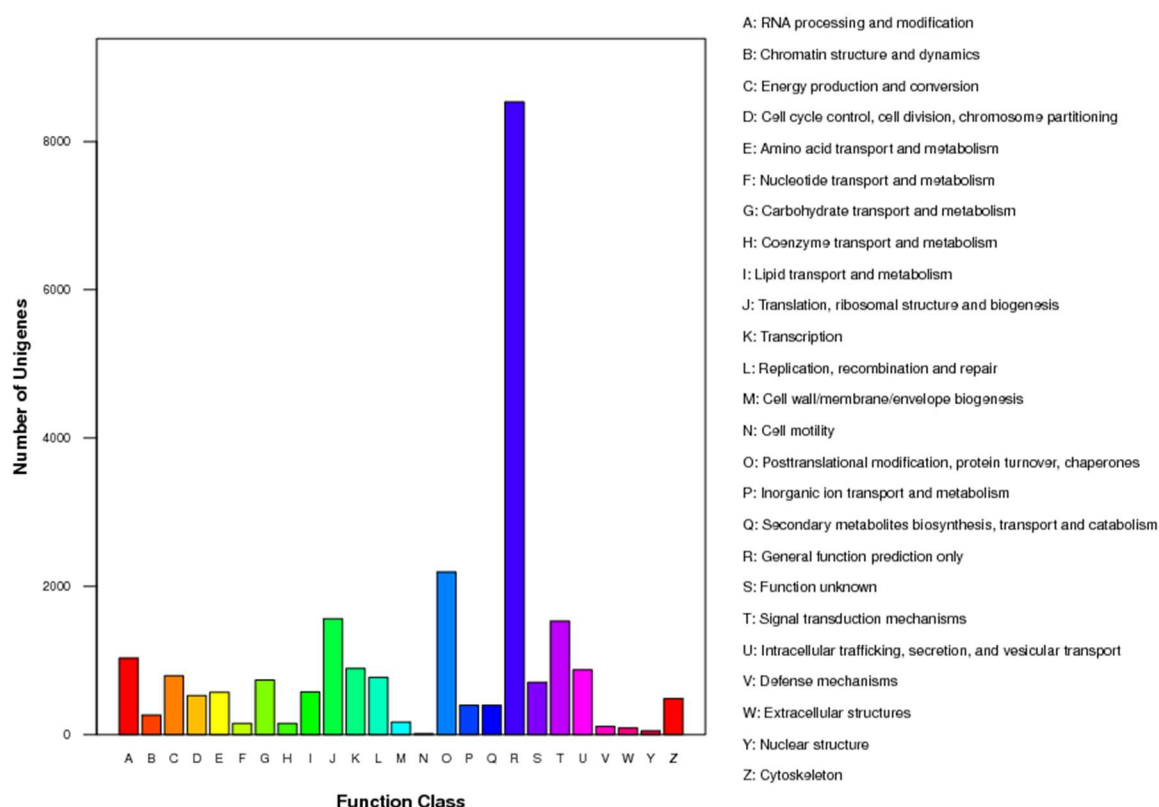

**Figure S4.** Distribution of unigenes in the transcriptome with KOG functional classification.

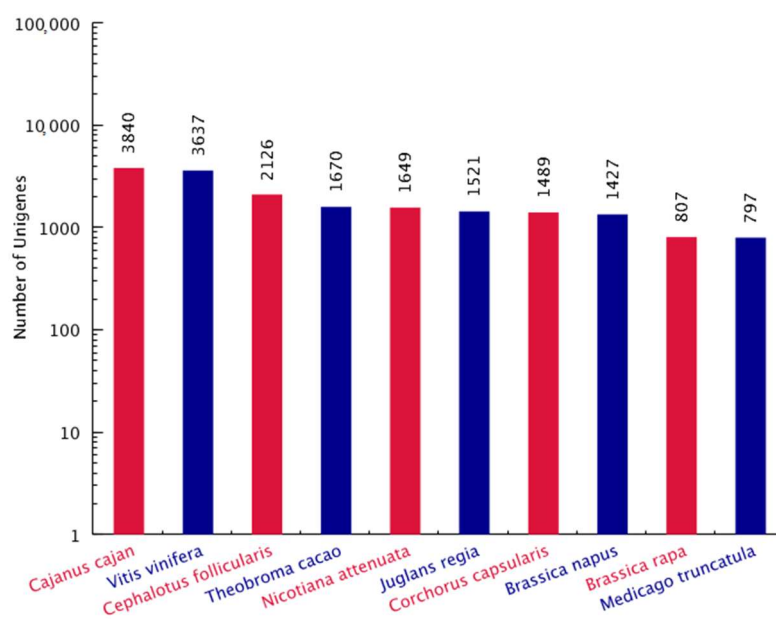

**Figure S5.** Annotation of unigenes on NR database and distribution of the top 10 species.

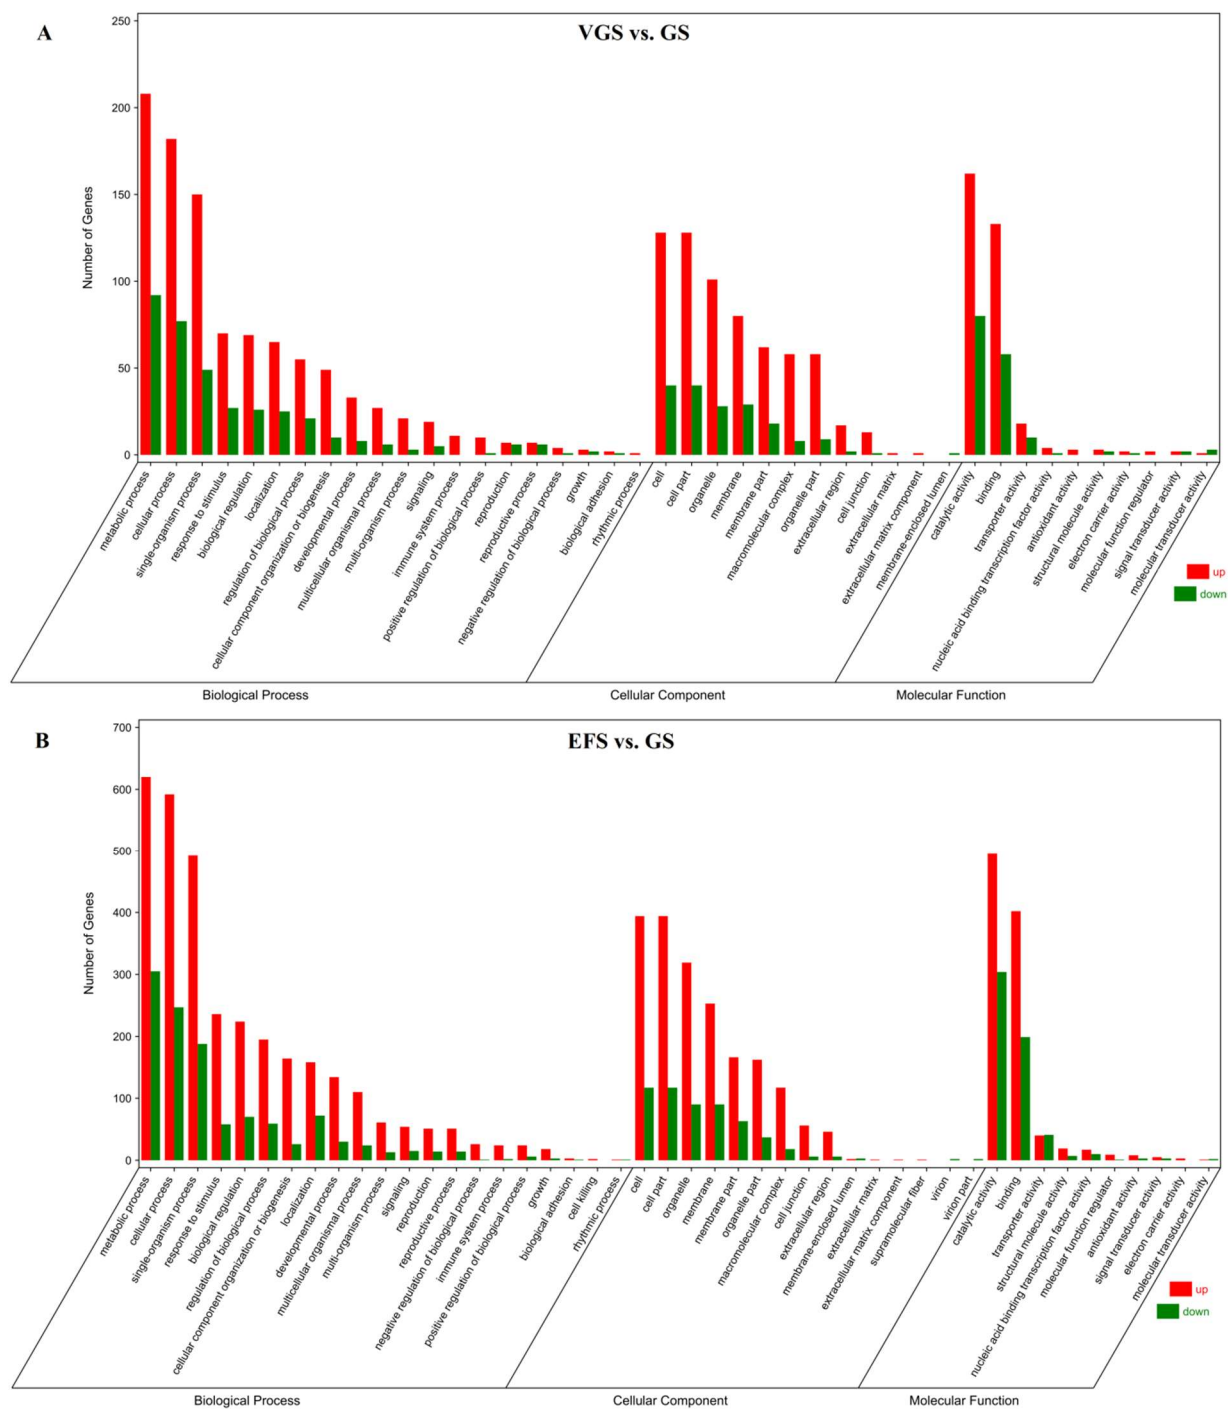

**Figure S6.** Annotation of unigenes on GO database and biological classification.

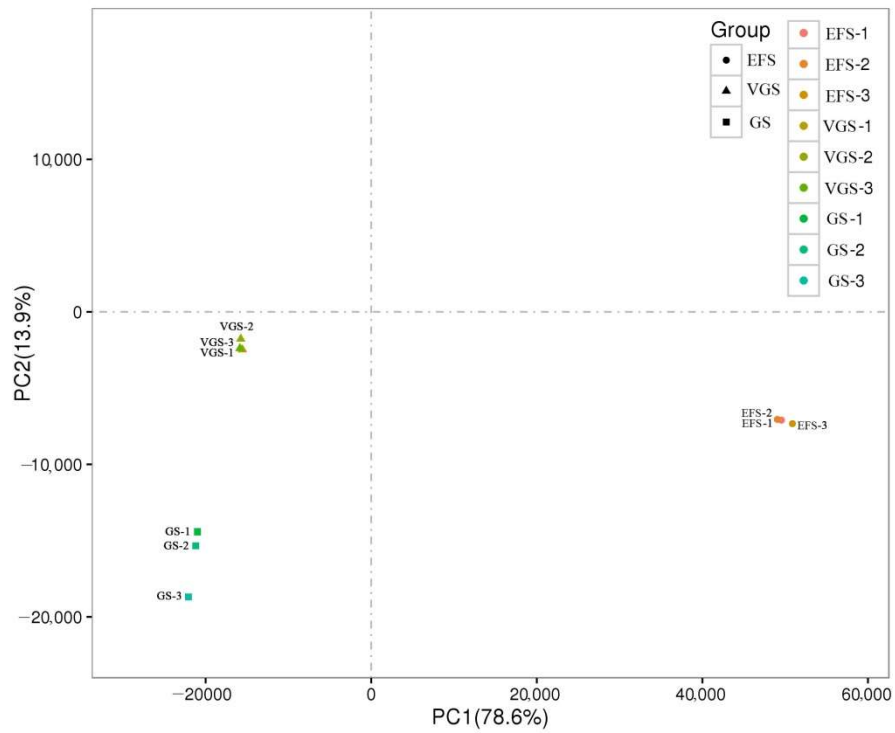

**Figure S7.** Principal component analysis (PCA) of GS, VGS and EFS.

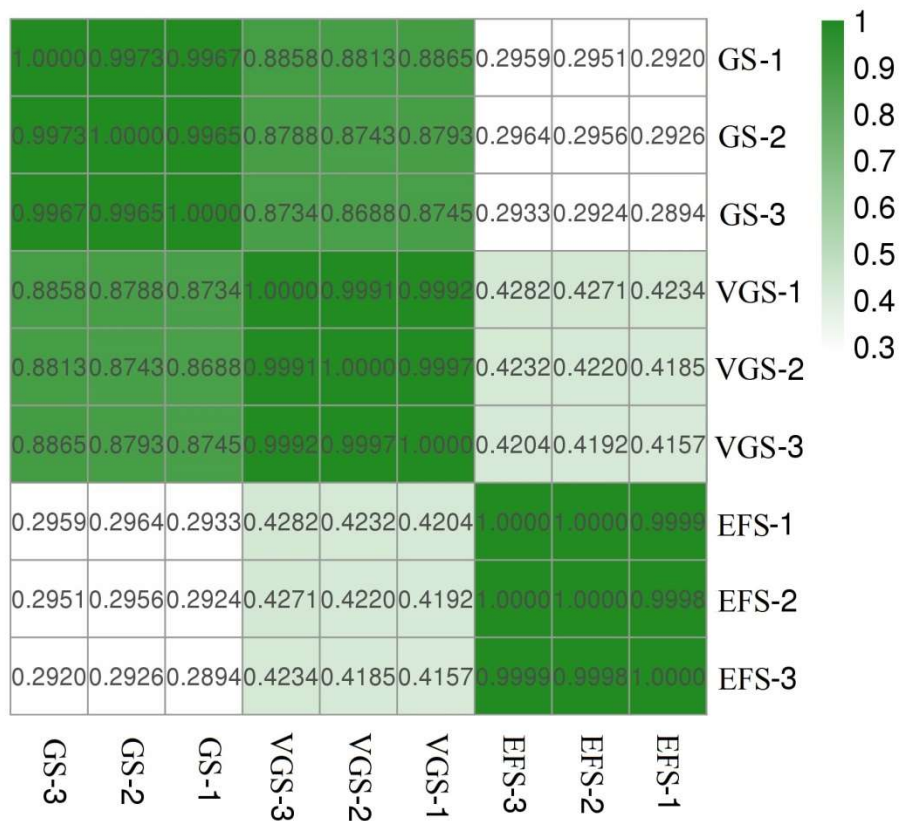

**Figure S8.** Pearson correlation analysis of GS, VGS and EFS.

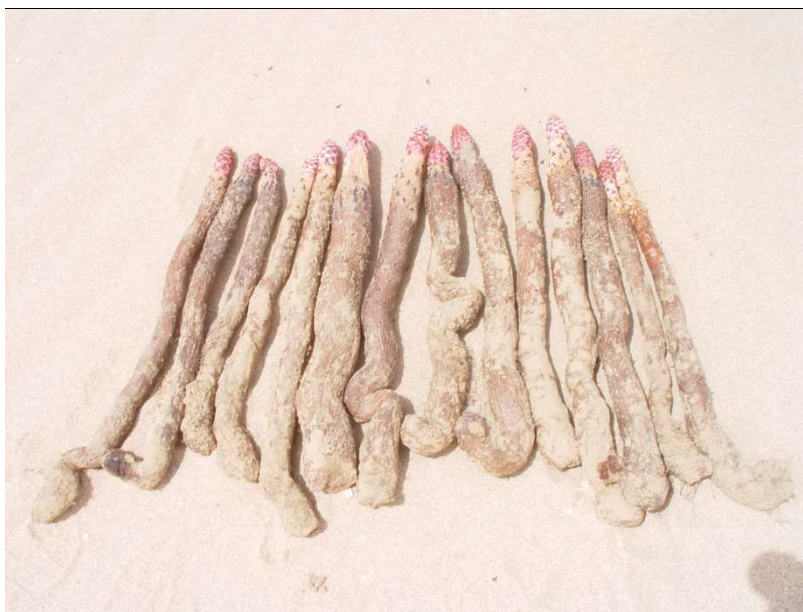

Figure S9. Growth characteristics of *C. songaricum* between the VGS and EFS.

## Table supplementary legends

**Table S1.** Twenty-four genes involved in polysaccharide biosynthesis at VGS and EFS vs. GS.

| Gene name            | SwissProt ID | Protein name                                                          | log <sub>2</sub> FC<br>(VGS vs.<br>GS) | log <sub>2</sub> FC<br>(EFS vs.<br>GS) |
|----------------------|--------------|-----------------------------------------------------------------------|----------------------------------------|----------------------------------------|
| <b>Glucose (5)</b>   |              |                                                                       |                                        |                                        |
| <i>BGLU23</i>        | Q9SR37       | Beta-glucosidase 23                                                   | 9.74                                   | 9.87                                   |
| <i>BGLU44</i>        | Q9LV33       | Beta-glucosidase 44                                                   | −1.51                                  | −2.89                                  |
| <i>At5g56590</i>     | Q9FJU9       | Glucan endo-1,3-beta-glucosidase 13                                   | 1.11                                   | −2.73                                  |
| <i>GAPA</i>          | P09043       | Glyceraldehyde-3-phosphate dehydrogenase A                            | 9.00                                   | 9.25                                   |
| <i>MTH_209</i>       | O26311       | Glyceraldehyde 3-phosphate phosphatase                                | 1.07                                   | 1.35                                   |
| <b>Sucrose (2)</b>   |              |                                                                       |                                        |                                        |
| <i>INVA</i>          | P29001       | Acid beta-fructofuranosidase                                          | 1.71                                   | 5.08                                   |
| <i>BFRUCT3</i>       | Q43348       | Acid beta-fructofuranosidase 3                                        | 5.29                                   | 8.64                                   |
| <b>Fructose (3)</b>  |              |                                                                       |                                        |                                        |
| <i>FBA2</i>          | Q944G9       | Fructose-bisphosphate aldolase 2, chloroplastic                       | 6.70                                   | 5.85                                   |
| <i>PFP-BETA</i>      | P21343       | Pyrophosphate--fructose 6-phosphate 1-phosphotransferase subunit beta | −1.41                                  | −2.94                                  |
| <i>At3g55800</i>     | P46283       | Sedoheptulose-1,7-bisphosphatase                                      | 7.54                                   | 7.29                                   |
| <b>Xylan (6)</b>     |              |                                                                       |                                        |                                        |
| <i>BXL5</i>          | Q9LJN4       | Probable beta-D-xylosidase 5                                          | 1.76                                   | 1.29                                   |
| <i>GT17</i>          | Q9CA34       | Probable xyloglucan galactosyltransferase GT17                        | −1.08                                  | −2.43                                  |
| <i>TBL19</i>         | Q9LFT0       | Protein trichome birefringence-like 19                                | 1.14                                   | 2.45                                   |
| <i>TBL31</i>         | Q1PFD9       | Protein trichome birefringence-like 31                                | 1.78                                   | 2.50                                   |
| <i>ESK1</i>          | Q9LY46       | Xylan O-acetyltransferase 1                                           | 1.25                                   | 2.34                                   |
| <i>XTH9</i>          | Q8LDW9       | Xyloglucan endotransglucosylase/hydrolase protein 9                   | 1.52                                   | 4.77                                   |
| <b>Trehalose (1)</b> |              |                                                                       |                                        |                                        |
| <i>TPPF</i>          | Q9SU39       | Probable trehalose-phosphate phosphatase F                            | 1.46                                   | 4.05                                   |
| <b>Pectin (7)</b>    |              |                                                                       |                                        |                                        |
| <i>PAE8</i>          | Q6DBP4       | Pectin acylesterase 8                                                 | 1.05                                   | 3.55                                   |
| <i>GAUT12</i>        | Q9FH36       | Probable galacturonosyltransferase 12                                 | 1.06                                   | 2.16                                   |
| <i>At5g63180</i>     | Q93Z25       | Probable pectate lyase 22                                             | 3.02                                   | 1.32                                   |
| <i>PME7</i>          | Q9SRX4       | Probable pectinesterase/pectinesterase inhibitor 7                    | 1.31                                   | 1.73                                   |
| <i>PMEI10</i>        | Q9SI74       | Pectinesterase inhibitor 10                                           | −1.43                                  | 1.80                                   |
| <i>PME15</i>         | Q9ZQA3       | Probable pectinesterase 15                                            | 1.32                                   | −4.61                                  |
| <i>PME40</i>         | O81301       | Probable pectinesterase/pectinesterase inhibitor 40                   | 2.47                                   | 3.17                                   |

**Table S2.** Fifty-five genes involved in other primary metabolism at VGS and EFS vs. GS.

| Gene name                                     | SwissProt ID | Protein name                                                 | log <sub>2</sub> FC<br>(VGS vs. GS) | log <sub>2</sub> FC<br>(EFS vs. GS) |
|-----------------------------------------------|--------------|--------------------------------------------------------------|-------------------------------------|-------------------------------------|
| <b>Lipid and fatty acid catabolic process</b> |              |                                                              |                                     |                                     |
| <i>BEAT</i>                                   | O64988       | Acetyl-CoA-benzylalcohol acetyltransferase                   | 1.84                                | − 5.09                              |
| <i>N/A</i>                                    | O04353       | Acyl-lipid (9-3)-desaturase                                  | 1.03                                | 1.82                                |
| <i>AOC</i>                                    | A2XID3       | Allene oxide cyclase, chloroplastic                          | 1.12                                | − 2.86                              |
| <i>At2g04020</i>                              | Q9SIF3       | GDSL esterase/lipase At2g04020                               | − 1.54                              | − 2.06                              |
| <i>At3g26430</i>                              | Q9LIN2       | GDSL esterase/lipase At3g26430                               | 8.93                                | 4.59                                |
| <i>At3g48460</i>                              | Q9STM6       | GDSL esterase/lipase At3g48460                               | 1.12                                | 2.09                                |
| <i>At5g33370</i>                              | Q8LB81       | GDSL esterase/lipase At5g33370                               | 2.40                                | 7.12                                |
| <i>GPAT5</i>                                  | Q9CAY3       | Glycerol-3-phosphate acyltransferase 5                       | 2.86                                | 2.39                                |
| <i>GDPD1</i>                                  | Q9SGA2       | Glycerophosphodiester phosphodiesterase GDPD1, chloroplastic | 3.29                                | 3.27                                |
| <i>NPC4</i>                                   | Q9SRQ7       | Non-specific phospholipase C4                                | 2.51                                | 2.31                                |
| <i>HB2</i>                                    | Q93Y92       | Non-symbiotic hemoglobin 2                                   | − 1.34                              | − 1.19                              |
| <i>MATP6-A</i>                                | P29527       | Oleosin 18.2 kDa                                             | 2.21                                | 1.87                                |
| <i>At4g25140</i>                              | P29525       | Oleosin 18.5 kDa                                             | 5.16                                | 5.31                                |
| <i>MTM1</i>                                   | F4J3T8       | Phosphatidylinositol-3-phosphatase myotubularin-1            | 1.66                                | 1.73                                |
| <i>At4g16820</i>                              | O23522       | Phospholipase A1-Ibata2, chloroplastic                       | 2.27                                | − 2.55                              |

|                                                       |        |                                                         |        |       |
|-------------------------------------------------------|--------|---------------------------------------------------------|--------|-------|
| <i>NMT2</i>                                           | Q944H0 | Phosphomethylethanolamine N-methyltransferase           | 1.14   | 2.36  |
| <i>At5g60760</i>                                      | Q9FJH9 | P-loop NTPase domain-containing protein LPA1 homolog 1  | 11.36  | 9.91  |
| <i>LPPB</i>                                           | Q9SUW4 | Probable lipid phosphate phosphatase beta               | -1.06  | -1.48 |
| <i>CER2</i>                                           | Q39048 | Protein ECERIFERUM 2                                    | -1.45  | -1.09 |
| <i>At1g17710</i>                                      | Q9FZ62 | Inorganic pyrophosphatase 2                             | -1.38  | -4.58 |
| <b>Amino acid metabolism</b>                          |        |                                                         |        |       |
| <i>serA</i>                                           | O29445 | D-3-phosphoglycerate dehydrogenase                      | -6.41  | -2.82 |
| <i>GEK1</i>                                           | Q9ZPQ3 | D-aminoacyl-tRNA deacylase                              | 9.41   | 7.71  |
| <i>GGAT2</i>                                          | Q9S7E9 | Glutamate--glyoxylate aminotransferase 2                | 6.41   | 5.76  |
| <i>GLN1-2</i>                                         | Q8LCE1 | Glutamine synthetase cytosolic isozyme 1-2              | 5.92   | 6.86  |
| <i>GLN2</i>                                           | O22506 | Glutamine synthetase, chloroplastic                     | 9.22   | 9.34  |
| <i>GLN4</i>                                           | P15102 | Glutamine synthetase leaf isozyme, chloroplastic        | 9.84   | 9.84  |
| <i>OVA9</i>                                           | Q8W4F3 | Glutamine--tRNA ligase, cytoplasmic                     | -1.23  | -2.69 |
| <i>GRXC3</i>                                          | Q6K609 | Glutaredoxin-C3                                         | 2.75   | 4.50  |
| <i>GRXC6</i>                                          | Q8L9S3 | Glutaredoxin-C6                                         | -1.04  | 1.10  |
| <i>GGT3</i>                                           | Q9M0G0 | Glutathione hydrolase 3                                 | -1.18  | -5.02 |
| <i>GSTF10</i>                                         | P42761 | Glutathione S-transferase F10                           | 9.15   | 8.81  |
| <i>GSTF12</i>                                         | Q9FE46 | Glutathione S-transferase F12                           | 3.08   | 2.62  |
| <i>DHAR2</i>                                          | Q67UK9 | Probable glutathione S-transferase DHAR2, chloroplastic | 10.97  | 10.98 |
| <i>At2g30660</i>                                      | Q6NMB0 | Probable 3-hydroxyisobutyryl-CoA hydrolase 3            | 1.30   | 2.55  |
| <i>AGT1</i>                                           | Q56YA5 | Serine--glyoxylate aminotransferase                     | 10.27  | 9.65  |
| <i>GLYM1</i>                                          | P49357 | Serine hydroxymethyltransferase 1, mitochondrial        | 9.87   | 9.93  |
| <i>GLYM2</i>                                          | P49358 | Serine hydroxymethyltransferase 2, mitochondrial        | 9.87   | 9.62  |
| <b>Others associated with carbohydrate metabolism</b> |        |                                                         |        |       |
| <i>ADH2</i>                                           | P04707 | Alcohol dehydrogenase 2                                 | -1.03  | -1.78 |
| <i>ACA7</i>                                           | Q8L817 | Alpha carbonic anhydrase 7                              | -2.56  | -1.72 |
| <i>CAHC</i>                                           | P17067 | Carbonic anhydrase, chloroplastic                       | 11.10  | 10.83 |
| <i>CTL2</i>                                           | Q9LSP9 | Chitinase-like protein 2                                | -1.13  | -2.20 |
| <i>ChiC</i>                                           | O81862 | Class V chitinase                                       | -1.47  | -2.53 |
| <i>CYN</i>                                            | A5BJL8 | Cyanate hydratase                                       | -1.34  | -5.26 |
| <i>CEL5</i>                                           | Q2V4L8 | Endoglucanase 3                                         | 1.62   | 1.43  |
| <i>GH5FP</i>                                          | C0HLA0 | Glycosyl hydrolase 5 family protein                     | 1.83   | 5.77  |
| <i>HPPR</i>                                           | Q65CJ7 | Hydroxyphenylpyruvate reductase                         | 8.21   | 9.74  |
| <i>MDHG</i>                                           | P46488 | Malate dehydrogenase, glyoxysomal                       | 9.08   | 9.08  |
| <i>KPPR</i>                                           | P27774 | Phosphoribulokinase, chloroplastic                      | 9.60   | 9.17  |
| <i>At1g56190</i>                                      | P50318 | Phosphoglycerate kinase 2, chloroplastic                | 10.39  | 10.28 |
| <i>At5g64460</i>                                      | Q9FGF0 | Phosphoglycerate mutase-like protein 1                  | 1.09   | 1.26  |
| <i>AKR1</i>                                           | C6TBN2 | Probable aldo-keto reductase 1                          | 8.64   | 9.26  |
| <i>PP2A10</i>                                         | Q9SY57 | Protein PHLOEM PROTEIN 2-LIKE A10                       | -12.07 | -9.24 |
| <i>SDR2b</i>                                          | Q9ZUH5 | Short-chain dehydrogenase/reductase 2b                  | 1.06   | 1.13  |
| <i>TKL-2</i>                                          | F4IW47 | Transketolase-2, chloroplastic                          | 6.08   | 5.48  |
| <i>TKT3</i>                                           | Q42676 | Transketolase, chloroplastic                            | 8.79   | 9.38  |

**Table S3.** Eleven genes involved in flavonoid biosynthesis at VGS and EFS vs. GS.

| Gene name       | SwissProt ID | Protein name                                          | log <sub>2</sub> FC<br>(VGS vs. GS) | log <sub>2</sub> FC<br>(EFS vs. GS) |
|-----------------|--------------|-------------------------------------------------------|-------------------------------------|-------------------------------------|
| <i>4CLL1</i>    | Q9LQ12       | 4-coumarate-CoA ligase-like 1                         | 1.45                                | 1.73                                |
| <i>4CLL6</i>    | Q84P24       | 4-coumarate-CoA ligase-like 6                         | 3.33                                | 8.48                                |
| <i>HST</i>      | Q9FI78       | Shikimate O-hydroxycinnamoyltransferase               | 1.67                                | 2.09                                |
| <i>CHI3</i>     | Q8VZW3       | Probable chalcone--flavanone isomerase 3              | 1.57                                | 1.24                                |
| <i>CAD9</i>     | P42734       | Probable cinnamyl alcohol dehydrogenase 9             | 1.10                                | -1.70                               |
| <i>CYP714C2</i> | Q2QYH7       | Cytochrome P450 714C2                                 | 1.45                                | 1.59                                |
| <i>CYP93B1</i>  | P93149       | Licodione synthase                                    | 1.22                                | 1.42                                |
| <i>F6'H1</i>    | Q9LHN8       | Feruloyl CoA ortho-hydroxylase 1                      | 2.11                                | -11.78                              |
| <i>UGT84A13</i> | V5LLZ9       | Gallate 1-beta-glucosyltransferase                    | 2.52                                | 2.02                                |
| <i>UGT87A1</i>  | O64732       | UDP-glycosyltransferase 87A1                          | -1.97                               | -3.00                               |
| <i>UGT94E5</i>  | F8WKW8       | Beta-D-glucosyl crocetin beta-1,6-glucosyltransferase | 1.09                                | -4.50                               |

**Table S4.** Five genes involved in terpene biosynthesis at VGS and EFS vs. GS.

| Gene name | SwissProt ID | Protein name | log <sub>2</sub> FC<br>(VGS vs. GS) | log <sub>2</sub> FC<br>(EFS vs. GS) |
|-----------|--------------|--------------|-------------------------------------|-------------------------------------|
|-----------|--------------|--------------|-------------------------------------|-------------------------------------|

|                    |        |                                                                   |      |        |
|--------------------|--------|-------------------------------------------------------------------|------|--------|
| <i>PINS</i>        | O23945 | (-)-alpha-pinene synthase                                         | 7.16 | 5.41   |
| <i>CYP716A15</i>   | F6H9N6 | Beta-amyrin 28-monooxygenase                                      | 1.08 | - 3.20 |
| <i>CYP716A52v2</i> | I7C6E8 | Beta-amyrin 28-monooxygenase                                      | 2.27 | 5.02   |
| <i>GGR</i>         | Q39108 | Heterodimeric geranylgeranyl pyrophosphate synthase small subunit | 1.38 | 2.55   |
| <i>STPS1</i>       | B5A435 | Sesquiterpene synthase                                            | 8.57 | 6.09   |

**Table S5.** Twenty genes involved in cell growth and flower development at VGS and EFS vs. GS.

| Gene name                      | SwissProt ID | Protein name                                            | log <sub>2</sub> FC<br>(VGS vs. GS) | log <sub>2</sub> FC<br>(EFS vs. GS) |
|--------------------------------|--------------|---------------------------------------------------------|-------------------------------------|-------------------------------------|
| <b>Cell growth (9)</b>         |              |                                                         |                                     |                                     |
| <i>AC58</i>                    | P30167       | Actin-58                                                | 8.64                                | 8.99                                |
| <i>ADF</i>                     | P30175       | Actin-depolymerizing factor                             | 1.06                                | 1.65                                |
| <i>ATJ11</i>                   | Q9FYB5       | Chaperone protein dnaJ 11                               | - 1.10                              | 1.88                                |
| <i>CYCP3-1</i>                 | Q75HV0       | Cyclin-P3-1                                             | 1.19                                | 2.77                                |
| <i>SDS</i>                     | Q1PFW3       | Cyclin-SDS                                              | 4.69                                | 5.72                                |
| <i>LRX6</i>                    | Q9LUI1       | Leucine-rich repeat extensin-like protein 6             | 1.51                                | 1.85                                |
| <i>MIZ1</i>                    | O22227       | Protein MIZU-KUSSEI 1                                   | - 1.43                              | - 1.06                              |
| <i>PATROL1</i>                 | Q8RX56       | Protein unc-13 homolog                                  | - 1.16                              | - 1.35                              |
| <i>TBB7</i>                    | Q6VAF5       | Tubulin beta-7 chain                                    | 9.49                                | 9.43                                |
| <b>Flower development (11)</b> |              |                                                         |                                     |                                     |
| <i>CSLD4</i>                   | Q9SZL9       | Cellulose synthase-like protein D4                      | - 3.38                              | - 1.88                              |
| <i>EXLB1</i>                   | O23547       | Expansin-like B1                                        | - 1.05                              | - 2.71                              |
| <i>AP1</i>                     | P35631       | Floral homeotic protein APETALA 1                       | 2.74                                | 8.25                                |
| <i>ASOL</i>                    | P29162       | L-ascorbate oxidase homolog                             | 1.19                                | 2.88                                |
| <i>AMP1</i>                    | Q9M1S8       | Probable glutamate carboxypeptidase AMP1                | - 1.02                              | - 4.74                              |
| <i>TKPR2</i>                   | Q9CA28       | Tetraketide alpha-pyrone reductase 2                    | 1.23                                | 1.34                                |
| <i>TCTP1</i>                   | P31265       | Translationally-controlled tumor protein 1              | 9.23                                | 10.45                               |
| <i>CYP704B1</i>                | Q9C788       | Cytochrome P450 704B1                                   | 1.86                                | 1.92                                |
| <i>HAT</i>                     | Q9M2N5       | Zinc finger BED domain-containing protein DAYSLEEPER    | - 7.25                              | - 4.08                              |
| <i>Os05g0239150</i>            | B9FJG3       | Zinc finger BED domain-containing protein RICESLEEPER 1 | - 1.62                              | - 1.44                              |
| <i>Os05g0583200</i>            | Q75HY5       | Zinc finger BED domain-containing protein RICESLEEPER 3 | 2.13                                | 2.50                                |

**Table S6.** Eight genes involved in other cell morphogenesis at VGS and EFS vs. GS.

| Gene name     | SwissProt ID | Protein name                        | log <sub>2</sub> FC<br>(VGS vs. GS) | log <sub>2</sub> FC<br>(EFS vs. GS) |
|---------------|--------------|-------------------------------------|-------------------------------------|-------------------------------------|
| <i>N/A</i>    | Q9XHP0       | 11S globulin seed storage protein 2 | - 7.63                              | - 3.80                              |
| <i>AT2S1</i>  | P15457       | 2S seed storage protein 1           | 10.08                               | 10.97                               |
| <i>CRA1</i>   | P15455       | 12S seed storage protein CRA1       | 3.64                                | 4.26                                |
| <i>CRB</i>    | P15456       | 12S seed storage protein CRB        | 4.49                                | 5.13                                |
| <i>SOP1</i>   | Q9SQ57       | Peroxygenase                        | 4.98                                | 4.19                                |
| <i>SBT1.3</i> | Q9FLI4       | Subtilisin-like protease SBT1.3     | - 1.72                              | - 4.13                              |
| <i>SBT1.7</i> | O65351       | Subtilisin-like protease SBT1.7     | - 2.90                              | - 3.08                              |
| <i>CYSEP</i>  | O65039       | Vignain                             | 2.27                                | 4.59                                |

**Table S7.** Twenty-two genes involved in hormone biosynthesis and signaling at VGS and EFS vs. GS.

| Gene name                       | SwissProt ID | Protein name                                             | log <sub>2</sub> FC<br>(VGS vs. GS) | log <sub>2</sub> FC<br>(EFS vs. GS) |
|---------------------------------|--------------|----------------------------------------------------------|-------------------------------------|-------------------------------------|
| <b>Hormone biosynthesis (7)</b> |              |                                                          |                                     |                                     |
| <i>YUC8</i>                     | Q9SVU0       | Probable indole-3-pyruvate monooxygenase YUCCA8          | 1.31                                | 1.72                                |
| <i>AIPT</i>                     | Q5GHF7       | Adenylate isopentenyltransferase                         | 1.94                                | 2.73                                |
|                                 |              | Cytokinin riboside 5'-monophosphate phosphoribohydrolase | 1.30                                | 1.14                                |
| <i>LOG5</i>                     | Q8LBB7       | LOG5                                                     |                                     |                                     |
| <i>LE</i>                       | O24648       | Gibberellin 3-beta-dioxygenase 1                         | - 2.11                              | - 3.91                              |
| <i>ACO1</i>                     | Q9MB94       | 1-aminocyclopropane-1-carboxylate oxidase                | 1.01                                | - 3.54                              |
| <i>ACS1</i>                     | P31531       | 1-aminocyclopropane-1-carboxylate synthase               | 1.07                                | - 2.70                              |
| <i>CYP707A6</i>                 | Q09J78       | Absciscic acid 8'-hydroxylase 2                          | - 1.07                              | - 2.02                              |



| <b>Hormone signaling (15)</b> |        |                                                        |        |        |
|-------------------------------|--------|--------------------------------------------------------|--------|--------|
| <i>AUX22D</i>                 | Q24542 | Auxin-induced protein 22D                              | 1.18   | 3.68   |
| <i>ARP12.5</i>                | Q05349 | Auxin-repressed 12.5 kDa protein                       | - 1.83 | - 2.75 |
| <i>SAUR71</i>                 | Q9SGU2 | Auxin-responsive protein SAUR71                        | 3.44   | 3.82   |
| <i>GH3.6</i>                  | Q9LSQ4 | Indole-3-acetic acid-amido synthetase GH3.6            | 2.43   | 2.58   |
| <i>PILS2</i>                  | Q9C999 | Protein PIN-LIKES 2                                    | - 2.00 | - 4.95 |
| <i>AHK4</i>                   | Q9C5U0 | Histidine kinase 4                                     | 4.25   | 3.47   |
| <i>JOX2</i>                   | Q9FFF6 | Jasmonate-induced oxygenase 2                          | 1.52   | - 7.98 |
| <i>AIL1</i>                   | Q1PFE1 | AP2-like ethylene-responsive transcription factor AIL1 | - 1.63 | 1.23   |
| <i>AIL6</i>                   | Q52QU2 | AP2-like ethylene-responsive transcription factor AIL6 | - 1.74 | 1.43   |
| <i>ETR2</i>                   | Q0WPQ2 | Ethylene receptor 2                                    | - 1.03 | - 1.95 |
| <i>SHN3</i>                   | Q3E958 | Ethylene-responsive transcription factor SHINE 3       | - 1.10 | - 1.97 |
| <i>REF6</i>                   | Q9STM3 | Lysine-specific demethylase REF6                       | 4.79   | 3.80   |
| <i>ERF010</i>                 | Q9FH94 | Ethylene-responsive transcription factor ERF010        | - 1.69 | - 4.43 |
| <i>ERF034</i>                 | Q8LBQ7 | Ethylene-responsive transcription factor ERF034        | - 1.12 | 1.49   |
| <i>ERF114</i>                 | Q9FH54 | Ethylene-responsive transcription factor ERF114        | 3.01   | 4.33   |

**Table S8.** Nineteen genes involved in other bio-signaling at VGS and EFS vs. GS.

| Gene name             | SwissProt ID | Protein name                                                         | log <sub>2</sub> FC (VGS vs. GS) | log <sub>2</sub> FC (EFS vs. GS) |
|-----------------------|--------------|----------------------------------------------------------------------|----------------------------------|----------------------------------|
| <b>Protein kinase</b> |              |                                                                      |                                  |                                  |
| <i>KRP7</i>           | Q94CL9       | Cyclin-dependent kinase inhibitor 7                                  | 1.04                             | 3.62                             |
| <i>CRK36</i>          | Q9XEC6       | Cysteine-rich receptor-like protein kinase 36                        | 2.31                             | 3.69                             |
| <i>LECRK2</i>         | A2XQD3       | G-type lectin S-receptor-like serine/threonine-protein kinase LECRK2 | - 2.01                           | - 7.27                           |
| <i>ERECTA</i>         | Q42371       | LRR receptor-like serine/threonine-protein kinase ERECTA             | - 1.07                           | 1.95                             |
| <i>SERPINE1</i>       | P13909       | Plasminogen activator inhibitor 1                                    | - 9.18                           | - 9.18                           |
| <i>At1g35710</i>      | Q9LP24       | Probable leucine-rich repeat receptor-like protein kinase At1g35710  | - 5.21                           | - 5.59                           |
| <i>At5g18500</i>      | Q8LEB6       | Probable receptor-like protein kinase At5g18500                      | 1.26                             | 2.95                             |
| <i>PERK4</i>          | Q9ZNQ8       | Proline-rich receptor-like protein kinase PERK4                      | - 1.11                           | - 3.82                           |
| <i>TMK4</i>           | Q9LK43       | Receptor-like kinase TMK4                                            | 1.98                             | 1.07                             |
| <i>SCPL31</i>         | O04084       | Serine carboxypeptidase-like 31                                      | - 2.83                           | - 3.04                           |
| <i>SCPL40</i>         | Q0WRX3       | Serine carboxypeptidase-like 40                                      | - 4.44                           | - 6.83                           |
| <i>UNC</i>            | Q9SYB9       | Serine/threonine-protein kinase UCN                                  | - 2.14                           | - 2.48                           |
| <b>Calcium</b>        |              |                                                                      |                                  |                                  |
| <i>RALFL4</i>         | Q9FZA0       | Protein RALF-like 4                                                  | 1.59                             | 1.20                             |
| <b>Others</b>         |              |                                                                      |                                  |                                  |
| <i>GF14C</i>          | Q6ZKC0       | 14-3-3-like protein GF14-C                                           | 6.78                             | 5.98                             |
| <i>CLE3</i>           | Q3EDH8       | CLAVATA3/ESR (CLE)-related protein 3                                 | - 1.89                           | - 1.28                           |
| <i>CLE27</i>          | Q9LUA1       | CLAVATA3/ESR (CLE)-related protein 27                                | - 1.53                           | - 1.37                           |
| <i>TIMP1</i>          | P20414       | Metalloproteinase inhibitor 1                                        | - 10.05                          | - 10.05                          |
| <i>ADM</i>            | O62827       | Pro-adrenomedullin                                                   | - 9.72                           | - 5.21                           |
| <i>At4g32285</i>      | Q8S9J8       | Probable clathrin assembly protein At4g32285                         | 2.16                             | 3.28                             |

**Table S9.** Twenty-eight TFs involved in flavonoid biosynthesis as well as growth and development at VGS and EFS vs. GS.

| Gene name                          | SwissProt ID | Protein name                                  | log <sub>2</sub> FC (VGS vs. GS) | log <sub>2</sub> FC (EFS vs. GS) |
|------------------------------------|--------------|-----------------------------------------------|----------------------------------|----------------------------------|
| <b>Flavonoid biosynthesis (12)</b> |              |                                               |                                  |                                  |
| <b>MYB (6)</b>                     |              |                                               |                                  |                                  |
| <i>LIMYB</i>                       | Q9FFJ8       | L10-interacting MYB domain-containing protein | 1.45                             | - 3.00                           |
| <i>MYB2</i>                        | Q10MB4       | Transcription factor MYB2                     | - 5.00                           | - 11.58                          |
| <i>MYB14</i>                       | Q9SJX8       | Transcription factor MYB14                    | 2.21                             | - 2.24                           |
| <i>MYB52</i>                       | Q6R0C4       | Transcription factor MYB52                    | 1.66                             | 2.56                             |
| <i>MYB83</i>                       | Q9C6U1       | Transcription factor MYB83                    | 1.22                             | 2.58                             |
| <i>MYB306</i>                      | P81392       | Myb-related protein 306                       | 1.37                             | 1.64                             |
| <b>bHLH (2)</b>                    |              |                                               |                                  |                                  |
| <i>BHLH52</i>                      | Q9SA82       | Transcription factor bHLH52                   | 2.78                             | 4.75                             |
| <i>BHLH94</i>                      | Q9SK91       | Transcription factor bHLH94                   | 1.31                             | - 1.83                           |

| <b>WRKY (4)</b>                    |        |                                                   |        |        |
|------------------------------------|--------|---------------------------------------------------|--------|--------|
| <i>WRKY6</i>                       | Q9C519 | WRKY transcription factor 6                       | 1.66   | - 1.52 |
| <i>WRKY53</i>                      | Q9SUP6 | Probable WRKY transcription factor 53             | 1.57   | 2.26   |
| <i>WRKY70</i>                      | Q9LY00 | Probable WRKY transcription factor 70             | - 1.20 | - 3.28 |
| <i>WRKY72</i>                      | Q9LXG8 | Probable WRKY transcription factor 72             | - 3.38 | - 1.24 |
| <b>Growth and development (16)</b> |        |                                                   |        |        |
| <b>Cell growth (8)</b>             |        |                                                   |        |        |
| <i>DREB2D</i>                      | Q9LQZ2 | Dehydration-responsive element-binding protein 2D | 1.03   | - 1.86 |
| <i>DREB3</i>                       | Q9LYD3 | Dehydration-responsive element-binding protein 3  | 1.82   | 2.40   |
| <i>At2g01810</i>                   | Q9ZUA9 | PHD finger protein At2g01810                      | - 1.74 | - 3.64 |
| <i>MMD1</i>                        | Q7X6Y7 | PHD finger protein MALE MEIOCYTE DEATH 1          | - 1.26 | - 2.55 |
| <i>PRE5</i>                        | Q9LJX1 | Transcription factor PRE5                         | 2.72   | 6.87   |
| <i>TCP9</i>                        | O64647 | Transcription factor TCP9                         | 2.19   | 2.94   |
| <i>TCP18</i>                       | A1YKT1 | Transcription factor TCP18                        | - 1.07 | - 1.29 |
| <i>UPB1</i>                        | O22901 | Transcription factor UPBEAT1                      | 1.68   | 2.19   |
| <b>Flower development (8)</b>      |        |                                                   |        |        |
| <i>AHL17</i>                       | Q9LTA2 | AT-hook motif nuclear-localized protein 17        | - 1.00 | - 4.88 |
| <i>AHL20</i>                       | Q8GWQ2 | AT-hook motif nuclear-localized protein 20        | - 2.43 | - 9.22 |
| <i>AHL22</i>                       | O22130 | AT-hook motif nuclear-localized protein 22        | - 1.28 | - 2.70 |
| <i>AHL23</i>                       | O23620 | AT-hook motif nuclear-localized protein 23        | - 1.23 | - 3.81 |
| <i>MIP1B</i>                       | Q9LRM4 | B-box domain protein 31                           | 2.02   | 1.75   |
| <i>HEC2</i>                        | Q9SND4 | Transcription factor HEC2                         | - 2.58 | - 4.44 |
| <i>SCRM</i>                        | Q9LSE2 | Transcription factor ICE1                         | 1.46   | 3.35   |
| <i>PAN</i>                         | Q9SX27 | Transcription factor PERIANTHIA                   | - 2.45 | - 2.20 |

**Table S10.** Ten genes involved in other TFs at VGS and EFS vs. GS.

| Gene name                           | SwissProt ID | Protein name                                  | log <sub>2</sub> FC<br>(VGS vs. GS) | log <sub>2</sub> FC<br>(EFS vs. GS) |
|-------------------------------------|--------------|-----------------------------------------------|-------------------------------------|-------------------------------------|
| <b>B3 domain-containing protein</b> |              |                                               |                                     |                                     |
| <i>ARF31</i>                        | Q8GYJ2       | B3 domain-containing protein At2g36080        | - 2.26                              | - 1.67                              |
| <i>Os03g0120900</i>                 | Q8LMR9       | B3 domain-containing protein Os03g0120900     | 1.85                                | 2.19                                |
| <i>Os12g0591300</i>                 | Q2QMT7       | B3 domain-containing protein Os12g0591400     | 1.19                                | - 1.91                              |
| <b>Transcription repressor</b>      |              |                                               |                                     |                                     |
| <i>OFPP7</i>                        | Q9ZU65       | Transcription repressor OFP7                  | 2.80                                | 1.08                                |
| <i>OFPP11</i>                       | O23341       | Transcription repressor OFP11                 | 1.18                                | 1.35                                |
| <i>OFPP14</i>                       | Q9S7T5       | Transcription repressor OFP14                 | - 1.41                              | - 2.75                              |
| <b>Zipper protein</b>               |              |                                               |                                     |                                     |
| <i>ATHB-40</i>                      | O23208       | Homeobox-leucine zipper protein ATHB-40       | - 1.82                              | - 1.99                              |
| <i>At1g68200</i>                    | Q9C9F5       | Zinc finger CCCH domain-containing protein 15 | 1.76                                | 4.08                                |
| <i>At2g19810</i>                    | O82199       | Zinc finger CCCH domain-containing protein 20 | - 1.49                              | - 2.10                              |
| <i>ZHD1</i>                         | A2Z259       | Zinc-finger homeodomain protein 1             | - 2.82                              | 2.22                                |

**Table S11.** Six genes involved in polysaccharide transport at VGS and EFS vs. GS.

| Gene name                         | SwissProt ID | Protein name                                   | log <sub>2</sub> FC<br>(VGS vs. GS) | log <sub>2</sub> FC<br>(EFS vs. GS) |
|-----------------------------------|--------------|------------------------------------------------|-------------------------------------|-------------------------------------|
| <b>Sugar transporter (3)</b>      |              |                                                |                                     |                                     |
| <i>SWEET5</i>                     | Q9FM10       | Bidirectional sugar transporter SWEET5         | 6.27                                | 7.12                                |
| <i>slc37a2</i>                    | Q7SY29       | Glucose-6-phosphate exchanger SLC37A2          | 10.56                               | 8.73                                |
| <i>At5g55950</i>                  | Q9FG70       | Nucleotide-sugar uncharacterized transporter 2 | 1.03                                | 1.13                                |
| <b>ABC transporter family (3)</b> |              |                                                |                                     |                                     |
| <i>ABCB2</i>                      | Q8LPK2       | ABC transporter B family member 2              | 6.70                                | 3.86                                |
| <i>ABCG1</i>                      | O80946       | ABC transporter G family member 1              | - 1.08                              | - 1.08                              |
| <i>ABCG22</i>                     | Q93YS4       | ABC transporter G family member 22             | - 1.28                              | - 1.17                              |

**Table S12.** Thirty-three genes involved in other transport at VGS and EFS vs. GS.

| Gene name                | SwissProt ID | Protein name | log <sub>2</sub> FC<br>(VGS vs. GS) | log <sub>2</sub> FC<br>(EFS vs. GS) |
|--------------------------|--------------|--------------|-------------------------------------|-------------------------------------|
| <b>Protein transport</b> |              |              |                                     |                                     |

|                                |        |                                                                 |         |         |
|--------------------------------|--------|-----------------------------------------------------------------|---------|---------|
| <i>ATG16L1</i>                 | Q5RAC9 | Autophagy-related protein 16-1                                  | 1.04    | 1.67    |
| <i>PEX12</i>                   | Q9M841 | Peroxisome biogenesis protein 12                                | - 10.61 | - 5.76  |
| <i>SFH12</i>                   | Q9A434 | Phosphatidylinositol/phosphatidylcholine transfer protein SFH12 | 2.04    | 1.69    |
| <b>Lipid transport</b>         |        |                                                                 |         |         |
| <i>LTP</i>                     | Q39794 | Non-specific lipid-transfer protein                             | - 3.61  | - 1.36  |
| <i>LTP4</i>                    | Q9LLR6 | Non-specific lipid-transfer protein 4                           | 9.47    | 9.93    |
| <b>Amino acid transport</b>    |        |                                                                 |         |         |
| <i>CAT1</i>                    | Q84MA5 | Cationic amino acid transporter 1                               | 2.16    | 3.49    |
| <i>BAC2</i>                    | Q9CA93 | Mitochondrial arginine transporter BAC2                         | - 2.28  | - 3.89  |
| <b>Aquaporin</b>               |        |                                                                 |         |         |
| <i>PIP2-2</i>                  | P43287 | Aquaporin PIP2-2                                                | 3.01    | 3.71    |
| <i>TIP1-2</i>                  | Q41963 | Aquaporin TIP1-2                                                | 8.55    | 9.36    |
| <i>TIP2-1</i>                  | Q41951 | Aquaporin TIP2-1                                                | 10.40   | 10.39   |
| <i>TIP1-1</i>                  | P50156 | Probable aquaporin TIP1-1                                       | - 9.87  | - 9.87  |
| <b>Ion transport</b>           |        |                                                                 |         |         |
| <i>CHX17</i>                   | Q9SUQ7 | Cation/H(+) antiporter 17                                       | - 3.63  | - 3.81  |
| <i>IRT2</i>                    | Q6L8G1 | Fe(2+) transport protein 2                                      | - 4.54  | - 1.87  |
| <i>PHT1-4</i>                  | Q96303 | Inorganic phosphate transporter 1-4                             | 1.62    | 2.88    |
| <i>MTP4</i>                    | Q10PP8 | Metal tolerance protein 4                                       | 3.50    | 3.22    |
| <i>MT4B</i>                    | Q42377 | Metallothionein-like protein 4B                                 | - 6.14  | - 3.06  |
| <i>MTI</i>                     | P30564 | Metallothionein-like protein type 2                             | - 5.55  | - 11.82 |
| <i>NDT1</i>                    | Q22261 | Nicotinamide adenine dinucleotide transporter 1                 | 1.30    | 1.13    |
| <i>CML18</i>                   | Q9M8U1 | Probable calcium-binding protein CML18                          | - 2.77  | - 4.27  |
| <i>NHX1</i>                    | Q68KI4 | Sodium/hydrogen exchanger 1                                     | 1.43    | 1.28    |
| <i>CAX1</i>                    | Q39253 | Vacuolar cation/proton exchanger 1                              | 9.34    | 8.96    |
| <i>ZIP3</i>                    | Q7XLD4 | Zinc transporter 3                                              | - 1.07  | - 2.95  |
| <b>Transmembrane transport</b> |        |                                                                 |         |         |
| <i>DTX40</i>                   | Q9LVD9 | Protein DETOXIFICATION 40                                       | - 1.22  | - 6.56  |
| <i>DTX45</i>                   | Q9SVE7 | Protein DETOXIFICATION 45                                       | 2.35    | 1.66    |
| <i>At4g08290</i>               | Q9SUF1 | WAT1-related protein At4g08290                                  | - 2.51  | - 8.35  |
| <b>Oligopeptide transport</b>  |        |                                                                 |         |         |
| <i>NPF4.3</i>                  | Q93VV5 | Protein NRT1/ PTR FAMILY 4.3                                    | - 1.01  | - 5.37  |
| <i>NPF5.6</i>                  | P0CI03 | Protein NRT1/ PTR FAMILY 5.6                                    | 1.54    | - 1.67  |
| <i>NPF6.2</i>                  | Q9SZY4 | Protein NRT1/ PTR FAMILY 6.2                                    | - 1.01  | - 1.22  |
| <b>Virus transport</b>         |        |                                                                 |         |         |
| <i>POL</i>                     | P19199 | Polyprotein P3                                                  | - 1.34  | - 1.10  |
| <i>POL2</i>                    | Q9YK98 | RNA2 polyprotein                                                | 1.04    | - 1.17  |
| <b>Others</b>                  |        |                                                                 |         |         |
| <i>XI-E</i>                    | F4HWY6 | Myosin-11                                                       | - 1.12  | - 1.33  |
| <i>ORP1C</i>                   | Q8L751 | Oxysterol-binding protein-related protein 1C                    | - 1.10  | - 1.23  |
| <i>At3g12180</i>               | Q9C7D7 | Protein cornichon homolog 1                                     | 1.76    | 1.62    |

**Table S13.** Forty-three genes involved in energy and photosynthesis at VGS and EFS vs. GS.

| Gene name             | SwissProt ID | Protein name                                                         | log <sub>2</sub> FC (VGS vs. GS) | log <sub>2</sub> FC (EFS vs. GS) |
|-----------------------|--------------|----------------------------------------------------------------------|----------------------------------|----------------------------------|
| <b>Energy</b>         |              |                                                                      |                                  |                                  |
| <i>ATPD</i>           | Q9SSS9       | ATP synthase subunit delta, chloroplastic                            | 10.03                            | 9.44                             |
| <i>ATPC</i>           | P29790       | ATP synthase gamma chain, chloroplastic                              | 9.33                             | 8.37                             |
| <i>petC</i>           | P26291       | Cytochrome b6-f complex iron-sulfur subunit, chloroplastic           | 9.32                             | 9.47                             |
| <i>MT-CO1</i>         | Q6EMS9       | Cytochrome c oxidase subunit 1                                       | - 10.83                          | - 7.36                           |
| <i>COX6B-1</i>        | Q9S7L9       | Cytochrome c oxidase subunit 6b-1                                    | 11.01                            | 10.41                            |
| <i>SEND33</i>         | Q43517       | Ferredoxin-1, chloroplastic                                          | 11.38                            | 10.90                            |
| <i>PETH</i>           | O04977       | Ferredoxin--NADP reductase, leaf-type isozyme, chloroplastic         | 5.03                             | 5.38                             |
| <i>GAPN</i>           | P93338       | NADP-dependent glyceraldehyde-3-phosphate dehydrogenase              | 2.27                             | 1.16                             |
| <i>RCA1</i>           | Q7X9A0       | Ribulose biphosphate carboxylase/oxygenase activase 1, chloroplastic | 8.75                             | 8.31                             |
| <i>RCA2</i>           | Q7X999       | Ribulose biphosphate carboxylase/oxygenase activase 2, chloroplastic | 12.79                            | 12.35                            |
| <i>RBCS</i>           | P31333       | Ribulose biphosphate carboxylase small subunit, chloroplastic        | 14.83                            | 14.67                            |
| <i>PETE</i>           | P00299       | Plastocyanin A, chloroplastic                                        | 12.18                            | 12.32                            |
| <i>CYB561D</i>        | Q9C540       | Probable transmembrane ascorbate ferrereductase 4                    | 1.29                             | 2.57                             |
| <b>Photosynthesis</b> |              |                                                                      |                                  |                                  |
| <i>LHCA4</i>          | P27521       | Chlorophyll a-b binding protein 4, chloroplastic                     | 10.05                            | 9.80                             |
| <i>LHCA1</i>          | Q01667       | Chlorophyll a-b binding protein 6, chloroplastic                     | 10.22                            | 9.89                             |

|                |        |                                                                                 |       |       |
|----------------|--------|---------------------------------------------------------------------------------|-------|-------|
| <i>CAB7</i>    | P10708 | Chlorophyll a-b binding protein 7, chloroplastic                                | 10.43 | 9.82  |
| <i>CAB13</i>   | P27489 | Chlorophyll a-b binding protein 13, chloroplastic                               | 8.91  | 8.90  |
| <i>CAB21</i>   | P27493 | Chlorophyll a-b binding protein 21, chloroplastic                               | 6.63  | 6.52  |
| <i>CAB-151</i> | P27518 | Chlorophyll a-b binding protein 151, chloroplastic                              | 11.99 | 11.71 |
| <i>CAP10A</i>  | P27524 | Chlorophyll a-b binding protein CP24 10A, chloroplastic                         | 10.78 | 10.30 |
| <i>LHCB4.1</i> | Q07473 | Chlorophyll a-b binding protein CP29.1, chloroplastic                           | 7.62  | 7.12  |
| <i>HPR-A</i>   | P13443 | Glycerate dehydrogenase                                                         | 8.85  | 9.18  |
| <i>CRD1</i>    | Q6SJV8 | Magnesium-protoporphyrin IX monomethyl ester [oxidative] cyclase, chloroplastic | 9.23  | 8.96  |
| <i>PSBO</i>    | Q40459 | Oxygen-evolving enhancer protein 1, chloroplastic                               | 11.47 | 10.89 |
| <i>PSBP1</i>   | Q7DM39 | Oxygen-evolving enhancer protein 2-1, chloroplastic                             | 11.04 | 11.04 |
| <i>PSBQ</i>    | P12301 | Oxygen-evolving enhancer protein 3, chloroplastic                               | 10.66 | 10.44 |
| <i>LHCA3</i>   | Q9SY97 | Photosystem I chlorophyll a/b-binding protein 3-1, chloroplastic                | 10.83 | 10.22 |
| <i>psaD</i>    | P12353 | Photosystem I reaction center subunit II, chloroplastic                         | 10.21 | 9.73  |
| <i>PSAF</i>    | Q9SHE8 | Photosystem I reaction center subunit III, chloroplastic                        | 10.06 | 9.48  |
| <i>PSAE</i>    | P13194 | Photosystem I reaction center subunit IV, chloroplastic                         | 10.20 | 9.66  |
| <i>PSAEB</i>   | Q41229 | Photosystem I reaction center subunit IV B, chloroplastic                       | 9.49  | 9.75  |
| <i>PSAG</i>    | Q9S7N7 | Photosystem I reaction center subunit V, chloroplastic                          | 10.61 | 9.96  |
| <i>PSAH</i>    | O04006 | Photosystem I reaction center subunit VI, chloroplastic                         | 6.73  | 7.06  |
| <i>PSAN</i>    | P49107 | Photosystem I reaction center subunit N, chloroplastic                          | 5.68  | 5.60  |
| <i>PSAK</i>    | Q9SUI5 | Photosystem I reaction center subunit psaK, chloroplastic                       | 10.93 | 10.79 |
| <i>PSAO</i>    | Q949Q5 | Photosystem I subunit O                                                         | 10.42 | 10.61 |
| <i>PSBT</i>    | P31336 | Photosystem II 5 kDa protein, chloroplastic                                     | 10.35 | 10.40 |
| <i>PSBR</i>    | P06183 | Photosystem II 10 kDa polypeptide, chloroplastic                                | 11.50 | 11.23 |
| <i>PSBY</i>    | P80470 | Photosystem II core complex proteins psbY, chloroplastic                        | 10.39 | 9.83  |
| <i>psbA</i>    | Q7FNT3 | Photosystem II protein D1                                                       | 7.07  | 6.06  |
| <i>PSY</i>     | P49293 | Phytoene synthase, chloroplastic                                                | 1.85  | 3.84  |
| <i>CURT1A</i>  | O04616 | Protein CURVATURE THYLAKOID 1A, chloroplastic                                   | 9.37  | 9.38  |
| <i>SPA3</i>    | Q9LJR3 | Protein SPA1-RELATED 3                                                          | 2.61  | 4.04  |

**Table S14.** Twenty-nine genes involved in polynucleotide metabolism at VGS and EFS vs. GS.

| Gene name                | SwissProt ID | Protein name                                                                | log <sub>2</sub> FC<br>(VGS vs.<br>GS) | log <sub>2</sub> FC<br>(EFS vs.<br>GS) |
|--------------------------|--------------|-----------------------------------------------------------------------------|----------------------------------------|----------------------------------------|
| <b>DNA replication</b>   |              |                                                                             |                                        |                                        |
| <i>NRPB11</i>            | Q38859       | DNA-directed RNA polymerases II, IV and V subunit 11                        | 2.24                                   | - 10.83                                |
| <i>LIG1</i>              | Q42572       | DNA ligase 1                                                                | - 10.99                                | - 10.99                                |
| <i>ENDO4</i>             | F4JJL0       | Endonuclease 4                                                              | - 1.23                                 | - 1.40                                 |
| <i>gag-pol</i>           | P08361       | Gag-Pol polyprotein                                                         | - 1.07                                 | - 2.14                                 |
| <i>gag-pro-pol</i>       | P07572       | Gag-Pro-Pol polyprotein                                                     | - 1.46                                 | - 1.46                                 |
| <i>ORC5</i>              | Q6EWX0       | Origin of replication complex subunit 5                                     | 1.18                                   | 1.74                                   |
| <i>ORC6</i>              | Q9ZVH3       | Origin of replication complex subunit 6                                     | 1.24                                   | 2.45                                   |
| <i>RTEL1</i>             | A0A0P0V4R0   | Regulator of telomere elongation helicase 1 homolog                         | 1.07                                   | 1.15                                   |
| <i>top6A</i>             | O05208       | Type 2 DNA topoisomerase 6 subunit A                                        | - 1.02                                 | - 1.29                                 |
| <b>DNA integration</b>   |              |                                                                             |                                        |                                        |
| <i>pol</i>               | Q8I7P9       | Retrovirus-related Pol polyprotein from transposon opus                     | - 1.36                                 | - 1.45                                 |
| <i>RE1</i>               | Q94HW2       | Retrovirus-related Pol polyprotein from transposon RE1                      | - 3.09                                 | - 3.72                                 |
| <i>R2</i>                | Q03274       | Retrovirus-related Pol polyprotein from type-1 retrotransposable element R2 | 1.76                                   | 1.39                                   |
| <b>DNA recombination</b> |              |                                                                             |                                        |                                        |
| <i>Pol</i>               | P11369       | LINE-1 retrotransposable element ORF2 protein                               | - 1.81                                 | - 1.19                                 |
| <b>DNA repair</b>        |              |                                                                             |                                        |                                        |
| <i>BARD1</i>             | F4I443       | BRCA1-associated RING domain protein 1                                      | - 13.14                                | - 8.35                                 |
| <i>EXO1</i>              | Q8L6Z7       | Exonuclease 1                                                               | 1.47                                   | 2.89                                   |
| <b>RNA processing</b>    |              |                                                                             |                                        |                                        |
| <i>XRN3</i>              | Q9FQ03       | 5'-3' exoribonuclease 3                                                     | 11.92                                  | 11.53                                  |
| <i>CSP41B</i>            | Q9SA52       | Chloroplast stem-loop binding protein of 41 kDa b, chloroplastic            | 9.59                                   | 9.34                                   |
| <i>At2g20020</i>         | Q9SL79       | CRS2-associated factor 1, chloroplastic                                     | 9.54                                   | 10.11                                  |
| <i>PCMP-H12</i>          | Q9LN01       | Pentatricopeptide repeat-containing protein At1g08070, chloroplastic        | - 1.10                                 | - 1.30                                 |
| <i>PCMP-H6</i>           | P93011       | Pentatricopeptide repeat-containing protein At2g33760                       | 3.68                                   | 3.32                                   |
| <i>At4g34730</i>         | O65693       | Probable ribosome-binding factor A, chloroplastic                           | - 10.94                                | - 3.99                                 |
| <i>PEL1</i>              | Q9ZT87       | Protein PELOTA 1                                                            | 9.38                                   | 8.11                                   |
| <i>TE1</i>               | O65001       | Protein terminal ear1                                                       | - 1.61                                 | 3.17                                   |

|                        |        |                                                      |        |        |
|------------------------|--------|------------------------------------------------------|--------|--------|
| <i>Os05g0571100</i>    | Q65XL5 | Protein WHAT'S THIS FACTOR 1 homolog, chloroplastic  | - 1.17 | - 1.07 |
| <b>RNA replication</b> |        |                                                      |        |        |
| <i>RDRP</i>            | O15925 | RNA-directed RNA polymerase                          | - 1.23 | - 1.81 |
| <b>Others</b>          |        |                                                      |        |        |
| <i>CID11</i>           | Q9LPI5 | Polyadenylate-binding protein-interacting protein 11 | 1.17   | 1.85   |
| <i>PHN1</i>            | Q69VD5 | Protein argonaute PNH1                               | - 1.04 | 1.26   |
| <i>DOGL3</i>           | Q58FV0 | Protein DOG1-like 3                                  | - 1.43 | - 3.34 |
| <i>FRS5</i>            | Q9SZL8 | Protein FAR1-RELATED SEQUENCE 5                      | - 2.38 | - 2.42 |

**Table S15.** Twenty-three genes involved in protein metabolism at VGS and EFS vs. GS.

| Gene name                           | SwissProt ID | Protein name                                        | log <sub>2</sub> FC<br>(VGS vs.<br>GS) | log <sub>2</sub> FC<br>(EFS vs.<br>GS) |
|-------------------------------------|--------------|-----------------------------------------------------|----------------------------------------|----------------------------------------|
| <b>Ribosomal protein</b>            |              |                                                     |                                        |                                        |
| <i>RPS16C</i>                       | Q42340       | 40S ribosomal protein S16-3                         | 9.49                                   | 9.98                                   |
| <i>RPS17</i>                        | P49215       | 40S ribosomal protein S17                           | - 8.31                                 | - 8.31                                 |
| <i>RPL22B</i>                       | Q9M9W1       | 60S ribosomal protein L22-2                         | 10.90                                  | 10.87                                  |
| <i>RPL9B</i>                        | P49209       | 60S ribosomal protein L9-1                          | 5.27                                   | 5.71                                   |
| <i>rnhA</i>                         | F9VN79       | Ribonuclease HI                                     | - 1.88                                 | - 2.02                                 |
| <i>RPL3</i>                         | O96774       | Ribosomal protein L3                                | 7.23                                   | 8.45                                   |
| <b>Protein ubiquitination</b>       |              |                                                     |                                        |                                        |
| <i>At2g24240</i>                    | Q9ZUH1       | BTB/POZ domain-containing protein At2g24240         | 2.77                                   | 3.22                                   |
| <i>At5g03250</i>                    | Q9LYW0       | BTB/POZ domain-containing protein At5g03250         | 1.08                                   | 1.17                                   |
| <i>At4g11680</i>                    | Q93Z92       | E3 ubiquitin-protein ligase At4g11680               | 11.39                                  | 10.26                                  |
| <i>ATL43</i>                        | Q5EAE9       | RING-H2 finger protein ATL43                        | 2.52                                   | 1.69                                   |
| <i>ATL79</i>                        | Q9FGJ6       | RING-H2 finger protein ATL79                        | - 1.03                                 | - 1.38                                 |
| <b>Protein folding</b>              |              |                                                     |                                        |                                        |
| <i>CALR</i>                         | O81919       | Calreticulin                                        | 1.24                                   | 1.30                                   |
| <i>PBP1</i>                         | O04314       | PYK10-binding protein 1                             | 5.06                                   | 5.25                                   |
| <b>Protein biosynthetic process</b> |              |                                                     |                                        |                                        |
| <i>fusA2</i>                        | I1K0K6       | Elongation factor G-2, chloroplastic                | 8.95                                   | 8.96                                   |
| <i>TUFB1</i>                        | P46280       | Elongation factor Tu, chloroplastic                 | 9.10                                   | 8.74                                   |
| <i>IF5A</i>                         | Q9AXJ4       | Eukaryotic translation initiation factor 5A         | - 4.36                                 | - 5.48                                 |
| <b>Protein catabolic process</b>    |              |                                                     |                                        |                                        |
| <i>MMP2</i>                         | Q9GLE5       | 72 kDa type IV collagenase                          | - 3.85                                 | - 5.07                                 |
| <i>VIT_05s0020g01830</i>            | A7NW79       | CASP-like protein 1D1                               | - 1.67                                 | - 4.50                                 |
| <i>COL1A2</i>                       | P02465       | Collagen alpha-2(I) chain                           | - 4.02                                 | - 6.03                                 |
| <i>ASY1</i>                         | F4HRV8       | Meiosis-specific protein ASY1                       | 1.01                                   | 3.55                                   |
|                                     |              | Peptide-N(4)-(N-acetyl-beta-glucosaminyl)asparagine | - 2.60                                 | - 2.75                                 |
| <i>PNG1</i>                         | Q7F0R1       | amidase                                             |                                        |                                        |
| <i>UBP12</i>                        | Q9FPT1       | Ubiquitin C-terminal hydrolase 12                   | 4.16                                   | 3.75                                   |
| <i>UREG</i>                         | O64700       | Urease accessory protein G                          | 1.29                                   | 6.65                                   |

**Table S16.** Thirty-one genes involved in stress response at VGS and EFS vs. GS.

| Gene name                                  | SwissProt ID | Protein name                                                | log <sub>2</sub> FC<br>(VGS vs. GS) | log <sub>2</sub> FC<br>(EFS vs. GS) |
|--------------------------------------------|--------------|-------------------------------------------------------------|-------------------------------------|-------------------------------------|
| <b>Hydrogen peroxide catabolic process</b> |              |                                                             |                                     |                                     |
| <i>CAT2</i>                                | P30567       | Catalase isozyme 2                                          | 10.60                               | 10.13                               |
| <i>PER12</i>                               | Q96520       | Peroxidase 12                                               | 1.13                                | 1.12                                |
| <i>PER19</i>                               | O22959       | Peroxidase 19                                               | - 1.46                              | - 3.67                              |
| <i>PER42</i>                               | Q9SB81       | Peroxidase 42                                               | - 9.62                              | - 9.62                              |
| <i>PER69</i>                               | Q96511       | Peroxidase 69                                               | 9.79                                | 10.15                               |
| <i>RBOHE</i>                               | O81211       | Respiratory burst oxidase homolog protein E                 | 1.41                                | 1.66                                |
| <b>Response to heat and cold</b>           |              |                                                             |                                     |                                     |
| <i>HSP17.7</i>                             | P19242       | 17.1 kDa class II heat shock protein                        | 3.76                                | 5.41                                |
| <i>HSP70-1</i>                             | P22953       | Heat shock 70 kDa protein 1                                 | 8.51                                | 9.57                                |
| <i>ERD14</i>                               | P42763       | Dehydrin ERD14                                              | 8.87                                | 9.65                                |
| <i>ERD15</i>                               | Q39096       | Protein EARLY RESPONSIVE TO DEHYDRATION 15                  | 8.96                                | 9.01                                |
| <b>Others</b>                              |              |                                                             |                                     |                                     |
| <i>CDR1</i>                                | Q6XBF8       | Aspartic proteinase CDR1                                    | - 1.83                              | - 1.59                              |
| <i>ML3</i>                                 | P82683       | Beta-galactoside-specific lectin 3                          | - 3.03                              | - 9.00                              |
| <i>BIG5</i>                                | F4IXW2       | Brefeldin A-inhibited guanine nucleotide-exchange protein 5 | - 9.42                              | - 1.90                              |

|                  |        |                                                       |         |         |
|------------------|--------|-------------------------------------------------------|---------|---------|
| <i>KRP1</i>      | O81831 | Calcium-binding protein KRP1                          | 9.37    | 9.91    |
| <i>CFB</i>       | P81187 | Complement factor B                                   | − 9.76  | − 9.76  |
| <i>DEF</i>       | A3FPF2 | Defensin-like protein                                 | 3.24    | 8.68    |
| <i>PI206</i>     | P13240 | Disease resistance response protein 206               | 1.13    | 2.26    |
| <i>ephB</i>      | I6YC03 | Epoxide hydrolase B                                   | 2.05    | 1.45    |
| <i>At5g07800</i> | Q9FF12 | Flavin-containing monooxygenase FMO GS-OX-like 9      | 2.10    | 3.73    |
| <i>HIPP37</i>    | A2RVM8 | Heavy metal-associated isoprenylated plant protein 37 | 1.58    | 3.66    |
| <i>IQM3</i>      | Q9LFA4 | IQ domain-containing protein IQM3                     | − 1.28  | − 3.27  |
| <i>JOX1</i>      | Q9SRM3 | Jasmonate-induced oxygenase 1                         | − 1.03  | − 5.49  |
| <i>MO3</i>       | Q9FLC2 | Monoxygenase 3                                        | − 1.67  | − 3.08  |
| <i>ATL24</i>     | Q8LBA0 | NEP1-interacting protein-like 2                       | 7.23    | 10.95   |
| <i>N/A</i>       | Q41350 | Osmotin-like protein                                  | 1.37    | 3.51    |
| <i>PTX3</i>      | Q0VCG9 | Pentraxin-related protein PTX3                        | − 10.80 | − 10.80 |
| <i>EXO</i>       | Q9ZPE7 | Protein EXORDIUM                                      | 9.02    | 9.31    |
| <i>EXL2</i>      | Q9FE06 | Protein EXORDIUM-like 2                               | − 1.29  | − 1.40  |
| <i>DLO2</i>      | Q9ZSA7 | Protein DMR6-LIKE OXYGENASE 2                         | − 2.25  | − 4.25  |
| <i>TSPO</i>      | O82245 | Translocator protein homolog                          | − 1.31  | − 2.69  |
| <i>AMP2-2</i>    | Q9SPL4 | Vicilin-like antimicrobial peptides 2-2               | − 3.33  | − 4.55  |

**Table S17.** Sequences of primer used in qRT-PCR validation.

| Genes                            | Sequences (5' to 3')                    | Amplicon size (bp) |
|----------------------------------|-----------------------------------------|--------------------|
| ACT                              | Forward: CTAAACCGCTTGTTGCTGGC           | 104                |
|                                  | Reverse: GGGGAGCTCACACGAAAGAT           |                    |
| Polysaccharide biosynthesis (12) |                                         |                    |
| BGLU23                           | Forward: TCGTCGGCAAGCGGTATTTTC          | 106                |
|                                  | Reverse: CGACAACCTAACGACGATGC           |                    |
| GAPA                             | Forward: GATTGGACGGATAGCCCACG           | 134                |
|                                  | Reverse: TGTCATCCGGCGCAATTCT            |                    |
| INVA                             | Forward: TGGTGATGGTTAGACTGGTTG          | 105                |
|                                  | Reverse: TTAACCGTTTCCACACTGCC           |                    |
| FBA2                             | Forward: TGTTGAGGTGGATGTGTGGT           | 183                |
|                                  | Reverse: GCCTTGCCGTAATAGTCTCAC          |                    |
| At3g55800                        | Forward: AATGGTGGGCAATAAGCAGG           | 114                |
|                                  | Reverse: TTCGGCCTATATGCACCCTC           |                    |
| BXL5                             | Forward: AACCTCAGCGGCTAATAAGG           | 159                |
|                                  | Reverse: ACAACGCCTGGACTTCATCTT          |                    |
| TBL31                            | Forward: GAGGGAGGGTTAGGCATTAC           | 149                |
|                                  | Reverse: GTTTTGGTGTCCCACTGCTC           |                    |
| XTH9                             | Forward: ATTGCCCAGCACTCACTACC           | 114                |
|                                  | Reverse: GGTACGCCTGAGAATAGGGC           |                    |
| TPPF                             | Forward: ACTTCTCAAGTTGCCCCACC           | 187                |
|                                  | Reverse: GACTCGAAGAGTGGGAGTGC           |                    |
| PAE8                             | Forward: ACAAGTGTGCTCGGAAAAGG           | 111                |
|                                  | Reverse: AGTTGACCTCGTCGTGTGTT           |                    |
| PME7                             | Forward: TCTGTGCTGGAAGGCAAATC           | 142                |
|                                  | Reverse: ATCACCATCACCACATGCAC           |                    |
| PMEI10                           | Forward: GGCAGCCAGATTGACTCTTTTC         | 100                |
|                                  | Reverse: GTTGGGTAATGGGTGGCACG           |                    |
| Flavonoid biosynthesis (11)      |                                         |                    |
| 4CLL1                            | Forward primer: TGTATTGAGGTGGATGTGTGGT  | 124                |
|                                  | Reverse primer: ATCGAACAACCTCAAATGGTTCT |                    |
| 4CLL6                            | Forward: CTCAAAGGACAAGGAGGCGT           | 195                |
|                                  | Reverse: TGATCCACCACTCATCTCCG           |                    |
| HST                              | Forward: CCAGAAAATGGGCCTGACAC           | 139                |
|                                  | Reverse: CACAGTCATCTGCGAGGTTT           |                    |
| CHI3                             | Forward: GGTCATCCAGTAACGAACGC           | 104                |
|                                  | Reverse: ATTCAGCGTCTGCTAACCGC           |                    |
| CAD9                             | Forward: TCCACTCGTCTAGGCACTCT           | 169                |
|                                  | Reverse: TGCTCCGGCCAGCTTTATG            |                    |
| CYP714C2                         | Forward: TGACCATGTCTAAAAGAGGTGGT        | 111                |
|                                  | Reverse: AATTGAGTTACGGCGGGGC            |                    |
| CYP93B1                          | Forward: CGCTCTGAAGGCGAGTAATG           | 178                |
|                                  | Reverse: ATCGGAATCGAATCGTGTGTT          |                    |

|                                                |                                                                      |     |
|------------------------------------------------|----------------------------------------------------------------------|-----|
| <i>F6'H1</i>                                   | Forward: ATCCACCAAAATGGCACTCC<br>Reverse: ATTGACGAGACTAGAAAGTGGCG    | 121 |
| <i>UGT84A13</i>                                | Forward: CCTCGACTGTTACATGCCCCG<br>Reverse: GAGAGGAGGTGTTCTGTCGTC     | 161 |
| <i>UGT87A1</i>                                 | Forward: TGACCTAGATTGCCACCCCT<br>Reverse: AAGCACCCCGAAATACCGTT       | 200 |
| <i>UGT94E5</i>                                 | Forward: TGGTTTGCCCATAGCACCTT<br>Reverse: CGGCACTACACATTTGACCT       | 161 |
| <b>Cell growth and flower development (8)</b>  |                                                                      |     |
| <i>AC58</i>                                    | Forward: ATTTGCCCCATGCTTCCACT<br>Reverse: TGTGCAAGTGGTTGAAGATCC      | 122 |
| <i>CYCP3-1</i>                                 | Forward: TCCTCGACCCTACTTCTGCT<br>Reverse: AGTGGTGTGCGAAATGTGGT       | 167 |
| <i>MIZ1</i>                                    | Forward: TGCCACAATGGCCCAAGATT<br>Reverse: TAGTGGTCCACCCTTACCGC       | 200 |
| <i>TBB7</i>                                    | Forward: TTCCGAGTCTTGCTTGTTGTT<br>Reverse: GCCCCATATGTGATATGAGTAAAGC | 131 |
| <i>AP1</i>                                     | Forward: ACCATCGAGACCGACACATC<br>Reverse: TCCAAGTCCGAATAGCCTCG       | 160 |
| <i>AMP1</i>                                    | Forward: CATCGTCACCGCTAGTCTCC<br>Reverse: CCGGGATTGGCATAGTTGGT       | 165 |
| <i>TKPR2</i>                                   | Forward: CAAGGGTTCAAATGAGGGTGG<br>Reverse: AATTTTCTCCAGCACTCCGT      | 162 |
| <i>HAT</i>                                     | Forward: ATGTGGGCAGAGGACTGATT<br>Reverse: GCTGAGAAATCGCCCATATTGTG    | 146 |
| <b>Hormone Biosynthesis and Signaling (15)</b> |                                                                      |     |
| <i>YUC8</i>                                    | Forward: TGATCTCCTAGGTGCGCTTC<br>Reverse: ATTATACGCCGTCGCCATCC       | 114 |
| <i>AIPT</i>                                    | Forward: GAGGTTGCTTTTGCTGGAC<br>Reverse: AACTGATCCGCTGTTACC          | 179 |
| <i>LOG5</i>                                    | Forward: GACCGCCCTGAGGGTAATTC<br>Reverse: GAGGAGGAGCGTACAACCAC       | 186 |
| <i>LE</i>                                      | Forward: CTACGGCGTCACGAATTGC<br>Reverse: CCACGACGCGAAAAATTGTG        | 117 |
| <i>ACO1</i>                                    | Forward: CCCGTGCAAATACCACAAGC<br>Reverse: TTGGATTTGGTCGGAGGAGC       | 172 |
| <i>ACS1</i>                                    | Forward: ACAGCAAGGAGCACGGATAG<br>Reverse: AAACACGGTTGTGTGACTCG       | 121 |
| <i>CYP707A6</i>                                | Forward: GTCGGTTTTCTGGTTCGGTT<br>Reverse: ACCACGACTCGACCAACCT        | 102 |
| <i>AUX22D</i>                                  | Forward: TTTTGGTTGCTTGGCTCACG<br>Reverse: TAAGCTTTGGACTTGCCGCT       | 108 |
| <i>SAUR71</i>                                  | Forward: GATAGTCCCGGAGGCAAGGT<br>Reverse: ACCTATGCACGAAAGTCGAGG      | 100 |
| <i>GH3.6</i>                                   | Forward: AGTCGACCCTTTTGAGGAC<br>Reverse: GCTCGTTCACATTCCCTCT         | 170 |
| <i>AHK4</i>                                    | Forward: CAAGAACCCAAGGGCCAAGT<br>Reverse: CGGAAAAGCACCCAGTCTCC       | 100 |
| <i>JOX2</i>                                    | Forward: CCTTCAGTCCAAAAGTGTTGGC<br>Reverse: GTCGAGTCAACCAAGGGATGT    | 149 |
| <i>AIL1</i>                                    | Forward: ATGGATGTGCGTGAGAGAGGT<br>Reverse: CTATCTGTCACTGGGGCAACT     | 148 |
| <i>ERF010</i>                                  | Forward: AGGGTTTGATTTCCAGGTTGG<br>Reverse: TGTTCGCGCACTGTCTACC       | 139 |
| <i>ERF114</i>                                  | Forward: AGGAGGTCCACGAAGGAGTT<br>Reverse: ATCGGCGAACCTTTGTCACT       | 150 |
| <b>Transcription factor (12)</b>               |                                                                      |     |
| <b>Flavonoid biosynthesis (6)</b>              |                                                                      |     |
| <i>MYB2</i>                                    | Forward: TAAGGAATAAGAACAACGGGGC<br>Reverse: AGCGATGATGCACGAATGTT     | 100 |
| <i>MYB14</i>                                   | Forward: TGAGGATAGTGCTAGAGGCAAC<br>Reverse: AGGGGTAAACTATGCCGATGG    | 100 |
| <i>MYB83</i>                                   | Forward: TGGTGTGTGGGCTCTTTTAC<br>Reverse: GTGGTGGTTGTAATGGGTGG       | 192 |

|                                     |                                                                   |     |
|-------------------------------------|-------------------------------------------------------------------|-----|
| <i>BHLH52</i>                       | Forward: TTGGCATGAGATGAGCTGCG<br>Reverse: GGTCCTCAGACAGCCAGAATG   | 101 |
| <i>WRKY6</i>                        | Forward: TTCAACTGGCCTCCTCGAAC<br>Reverse: CAACCTTTTCCACCGATGCC    | 190 |
| <i>WRKY53</i>                       | Forward: TTGGGCGAATTGTCCAGTC<br>Reverse: GGGGGCTTAGACTAGGGTTG     | 125 |
| <i>WRKY72</i>                       | Forward: GGCTCGGTATTATCCTCCGC<br>Reverse: CGACAGCAACTCCGCAAAAT    | 132 |
| <b>Growth and development (6)</b>   |                                                                   |     |
| <i>DREB2D</i>                       | Forward: GGTGTTTCGTCTGTACGTCT<br>Reverse: TCGTCGTTCCCAATCTCGTC    | 195 |
| <i>At2g01810</i>                    | Forward: TCGGCACCCCTAAAACTGC<br>Reverse: AGGGTGAGGAGTGCAAAGAC     | 109 |
| <i>TCP9</i>                         | Forward: AGCTTCTTTGGATTGCGCCT<br>Reverse: TGGCTCTGACACCATGAAGAC   | 130 |
| <i>UPB1</i>                         | Forward: GAAGGGGGTTCGGTTGGTC<br>Reverse: CGAGCAGTAGCCCAAAACAAT    | 195 |
| <i>AHL20</i>                        | Forward: TCACCAGGCGTGAATGTCT<br>Reverse: GAGAAGGACAAGAGGTGCGT     | 200 |
| <b>Polysaccharide transport (6)</b> |                                                                   |     |
| <i>SWEET5</i>                       | Forward: CTCCTTCGCCCAGCCATTAC<br>Reverse: AGCAACATGAGGCCAAAAGTC   | 192 |
| <i>slc37a2</i>                      | Forward: GGTGGCATCGTAGCTGGATT<br>Reverse: TCCATTACGAGAGCACCAC     | 171 |
| <i>At5g55950</i>                    | Forward: TGAGTTGGTACCCTCTTGGTG<br>Reverse: TCAGGACCTCCTCCTCGATAC  | 104 |
| <i>ABC2</i>                         | Forward: AAAGGTTCCACATGCCTCCAC<br>Reverse: ACTACTTCCCAGCGTTCCTT   | 132 |
| <i>ABCG1</i>                        | Forward: TTCTGACGGACTTCTAAACTCTT<br>Reverse: GTATGCGTGCTGGCCTTTTC | 156 |
| <i>ABCG22</i>                       | Forward: GGCGCTCGTCATAGATGGTT<br>Reverse: AACTTCCTTCCAGTGTCCCG    | 161 |
